# Supplementary material for: Safeguarding Cultural Heritage: Integrative Analysis of Gravitational Mass Movements at the Mortuary Temple of Hatshepsut, Luxor, Egypt
Source: Copernicus journal article supplement (doi:10.5194/egusphere-2025-2007), 2025-05-20
Supplement: Supplementary file 1 [file egusphere-2025-2007-supplement.pdf]

**S1: Block shape dimensions (X / Y / Y (m)) from the TLS change detection.**

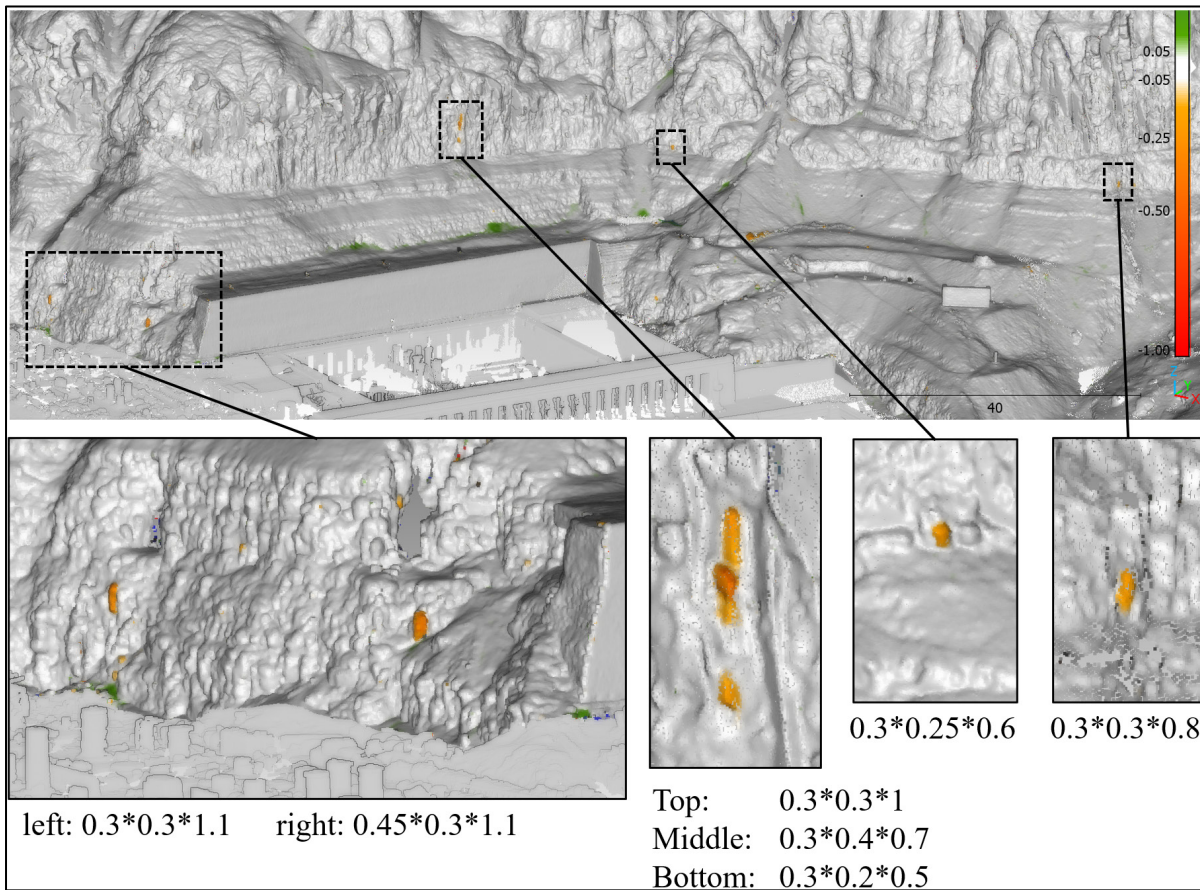

**S2: Block shape dimensions (X / Y / Y (m)) of potential larger rockfall from the TLS point cloud.**

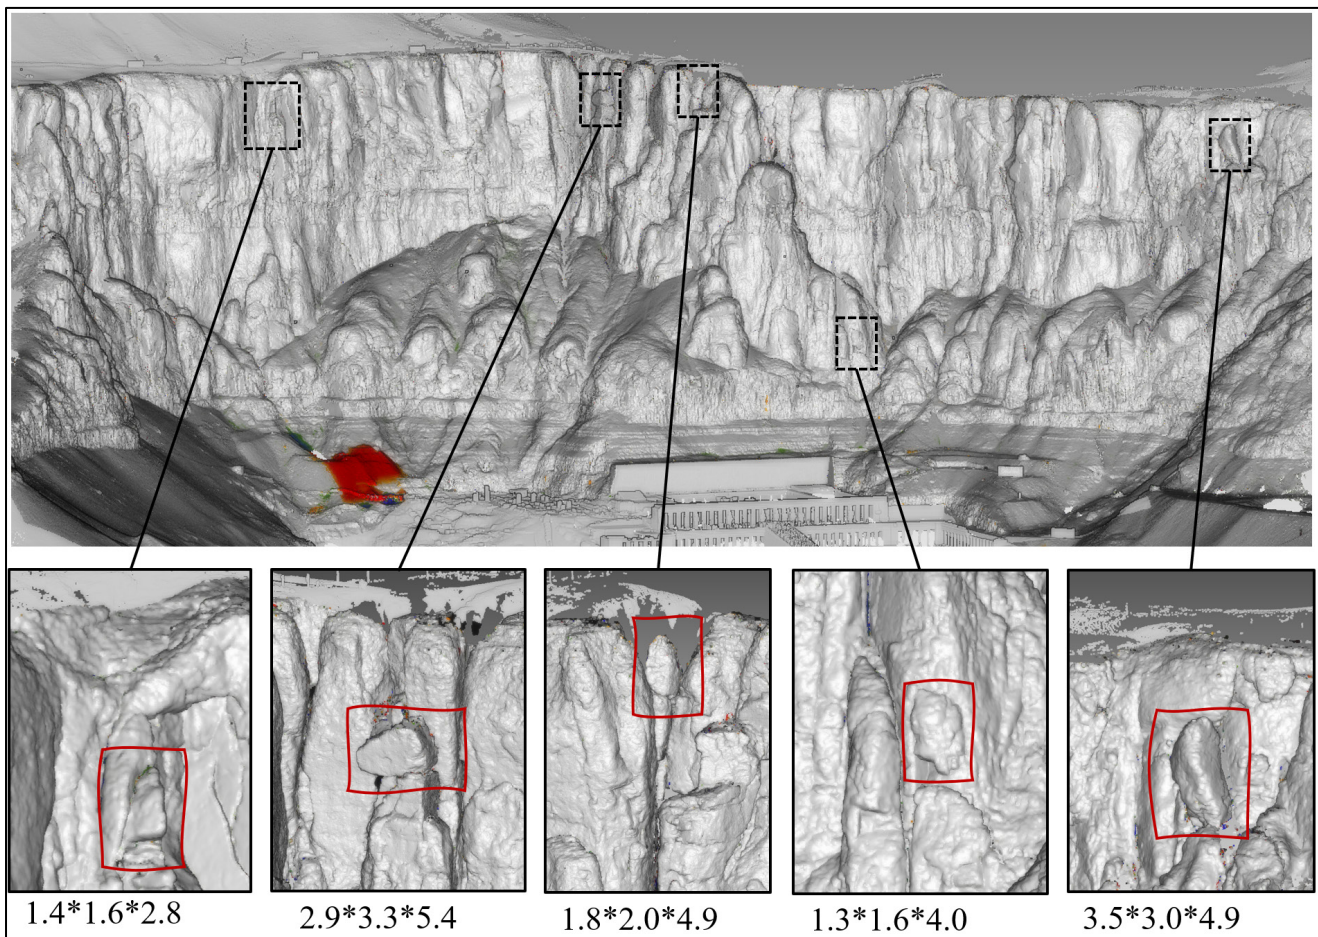

### S3: RAMMS::ROCKFALL parameters in Addition to Fig. 2 and 4

| Variable parameters                       |                                           |                                           |                                            |
|-------------------------------------------|-------------------------------------------|-------------------------------------------|--------------------------------------------|
| 0.01 m³                                   | 0.1 m³                                    | 2.0 m³                                    | 25.0 m³                                    |
| Shape X / Y / Z (m)<br>0.32 / 0.19 / 0.16 | Shape X / Y / Z (m)<br>0.75 / 0.45 / 0.38 | Shape X / Y / Z (m)<br>2.07 / 1.24 / 1.03 | Shape X / Y / Z (m)<br>4.78 / 2.87 / 2.39  |
| Terrain<br>ER: Extra hard<br>SC: Hard     | Terrain<br>ER: Extra hard<br>SC: Hard     | Terrain<br>ER: Extra hard<br>SC: Hard     | Terrain<br>ER: Extra hard<br>SC: Med. hard |
| Constant parameters                       |                                           |                                           |                                            |
| DSM grid res. (m)                         | 0.5                                       |                                           |                                            |
| Dump step (s)                             | 0.02                                      |                                           |                                            |
| Stop criterion                            | Min. kinetic energy                       |                                           |                                            |
| Rock shape                                | Long_2.0                                  |                                           |                                            |
| Density (kg/m³)                           | 2700                                      |                                           |                                            |
| Nr. Random orientations                   | 20                                        |                                           |                                            |
| Use every x <sup>th</sup> grid point      | 6                                         |                                           |                                            |
| Initial (rotational) velocity (m/s)       | 0                                         |                                           |                                            |
| Rock Z-offset (m)                         | automatic                                 |                                           |                                            |

### S4: Release volume estimation for granular flow simulations with RAMMS::DEBRISFLOW. Runout lengths and deposits heights were estimated by comparing typical terrain features from the 1892 (Naville, 1894) image to the TLS point cloud model.

| Event A: deposits Thutmose III temple                                                                                                                                                                                                                                 | Event B: cone-shaped deposits N° Temple of Hatshepsut                                                                                                                                                                                                                                                                                                           |
|-----------------------------------------------------------------------------------------------------------------------------------------------------------------------------------------------------------------------------------------------------------------------|-----------------------------------------------------------------------------------------------------------------------------------------------------------------------------------------------------------------------------------------------------------------------------------------------------------------------------------------------------------------|
| 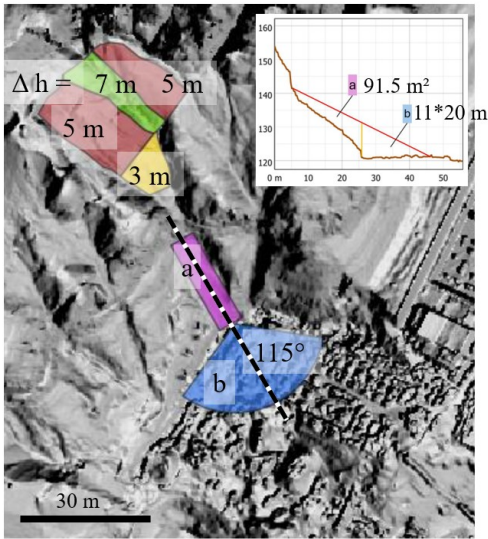 <p><math>\Delta h = 7 \text{ m}</math> <math>5 \text{ m}</math> <math>3 \text{ m}</math></p> <p><math>115^\circ</math></p> <p>30 m</p> <p>160 m</p> <p>91.5 m²</p> <p>11*20 m</p> |  <p>Simplified cross section</p> <p>Simplified top view</p> <p>75°</p> <p>33 m</p> <p>28 m</p> <p>11 m</p> <p>17 m, estimated by comparing historic image (1892) to TLS</p> <p>Esna Shale Slope in surroundings</p> <p>Recent talus</p> <p>Estimation before excavation</p> |
| $5*400 + 7*130 + 3*80 = 3150 \text{ m}^3$<br>$5*91,5 + 115/360*\pi/3*20^2*11 = 1928.0 \text{ m}^3$<br>$\sim 5080 \text{ m}^3$                                                                                                                                         | $75/360 * (\pi/3*28^2*17 - \pi/3*11^2*11) = 2617.0 \text{ m}^3$                                                                                                                                                                                                                                                                                                 |



# S5: RAMMS::DEBRISFLOW parameters table from Log file.

| Event A                                                                                                                                                                                                                                                                                                                            | Event B                                                                                                                                                                                                                                                                                                                           |
|------------------------------------------------------------------------------------------------------------------------------------------------------------------------------------------------------------------------------------------------------------------------------------------------------------------------------------|-----------------------------------------------------------------------------------------------------------------------------------------------------------------------------------------------------------------------------------------------------------------------------------------------------------------------------------|
| Simulation stopped after 30.0000s<br>Calculation time (min.): 2.72<br>Simulation resolution (m): 0.50                                                                                                                                                                                                                              | Simulation stopped after 14.0000s<br>Calculation time (min.): 0.72<br>Simulation resolution (m): 0.50                                                                                                                                                                                                                             |
| SIMULATION RESULTS                                                                                                                                                                                                                                                                                                                 | SIMULATION RESULTS                                                                                                                                                                                                                                                                                                                |
| Calculated Release Volume (m3): 5130.00<br>Overall MAX velocity (m/s): 16.8820<br>Overall MAX flowheight (m): 13.4501<br>Overall MAX pressure (kPa): 513.001                                                                                                                                                                       | Calculated Release Volume (m3): 2600.00<br>Overall MAX velocity (m/s): 39.9211<br>Overall MAX flowheight (m): 12.0633<br>Overall MAX pressure (kPa): 2868.66                                                                                                                                                                      |
| RAMMS::DEBRIS FLOW 1.8.0 INPUT LOGFILE                                                                                                                                                                                                                                                                                             | RAMMS::DEBRIS FLOW 1.8.0 INPUT LOGFILE                                                                                                                                                                                                                                                                                            |
| DEM resolution (m): 0.50                                                                                                                                                                                                                                                                                                           | DEM resolution (m): 0.50                                                                                                                                                                                                                                                                                                          |
| GENERAL SIMULATION PARAMETERS:<br>Simulation time (s): 1000.00<br>Dump interval (s): 1.00<br>Stopping criteria (momentum threshold) (%): 10<br>Center-of-Mass vel threshold (m/s): 1.00<br>Constant density (kg/m3): 1800<br>Lambda (): 1.0                                                                                        | GENERAL SIMULATION PARAMETERS:<br>Simulation time (s): 1000.00<br>Dump interval (s): 1.00<br>Stopping criteria (momentum threshold) (%): 10<br>Center-of-Mass vel threshold (m/s): 1.00<br>Constant density (kg/m3): 1800<br>Lambda (): 1.0                                                                                       |
| NUMERICS:<br>Numerical scheme: SecondOrder<br>H cutoff (m): 0.000001<br>Curvature effects are ON!                                                                                                                                                                                                                                  | NUMERICS:<br>Numerical scheme: SecondOrder<br>H cutoff (m): 0.000001<br>Curvature effects are ON!                                                                                                                                                                                                                                 |
| RELEASE:                                                                                                                                                                                                                                                                                                                           | RELEASE:                                                                                                                                                                                                                                                                                                                          |
| Hydrograph<br>Hydrograph volume: 5130.00 m3<br>InFlow direction: 0<br>Nr of hydrograph points: 3<br>t0: 0.000000 [s]<br>Q0: 0.000000 [m3/s]<br>v0: 0.000000 [m/s]<br>t1: 0.500000 [s]<br>Q1: 2052.00 [m3/s]<br>v1: 0.000000 [m/s]<br>t2: 5.000000 [s]<br>Q2: 0.000000 [m3/s]<br>v2: 0.000000 [m/s]<br>Hydrograph end time: 5.00000 | Hydrograph<br>Hydrograph volume: 2600.00 m3<br>InFlow direction: 290<br>Nr of hydrograph points: 3<br>t0: 0.000000 [s]<br>Q0: 0.000000 [m3/s]<br>v0: 15.0000 [m/s]<br>t1: 0.500000 [s]<br>Q1: 1040.00 [m3/s]<br>v1: 15.0000 [m/s]<br>t2: 5.000000 [s]<br>Q2: 0.000000 [m3/s]<br>v2: 15.0000 [m/s]<br>Hydrograph end time: 5.00000 |
| FRICTION MUXI:<br>Mu (): 0.650<br>Xi (m/s2): 800                                                                                                                                                                                                                                                                                   | FRICTION MUXI:<br>Mu (): 0.650<br>Xi (m/s2): 800                                                                                                                                                                                                                                                                                  |
| COHESION:<br>No COHESION specified.                                                                                                                                                                                                                                                                                                | COHESION:<br>No COHESION specified.                                                                                                                                                                                                                                                                                               |

# S6: Section of rock face used for retreat rate area calculation. Area calculation is based on subsampled point cloud (1 m point spacing) and a poisson surface reconstruction (Kazhdan et al., 2006).

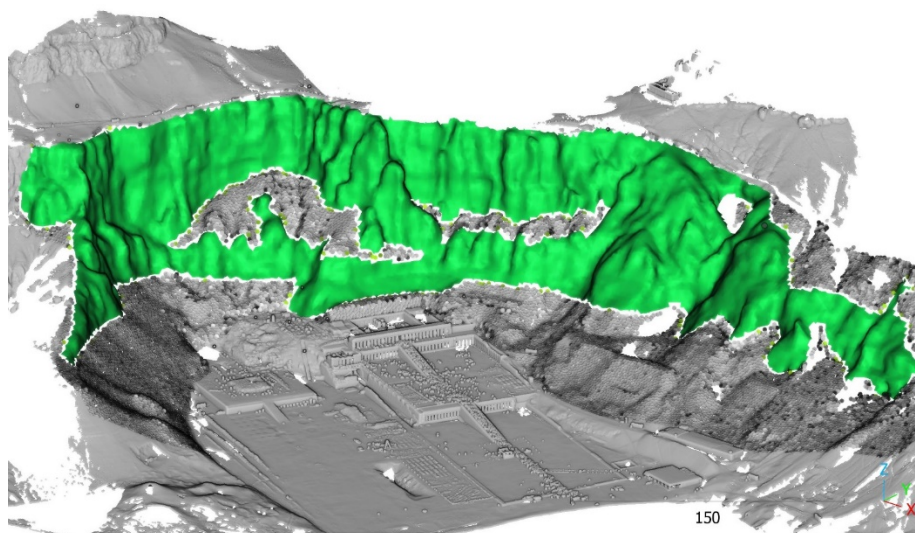

S7: Temporal distribution of InSAR data acquisition.

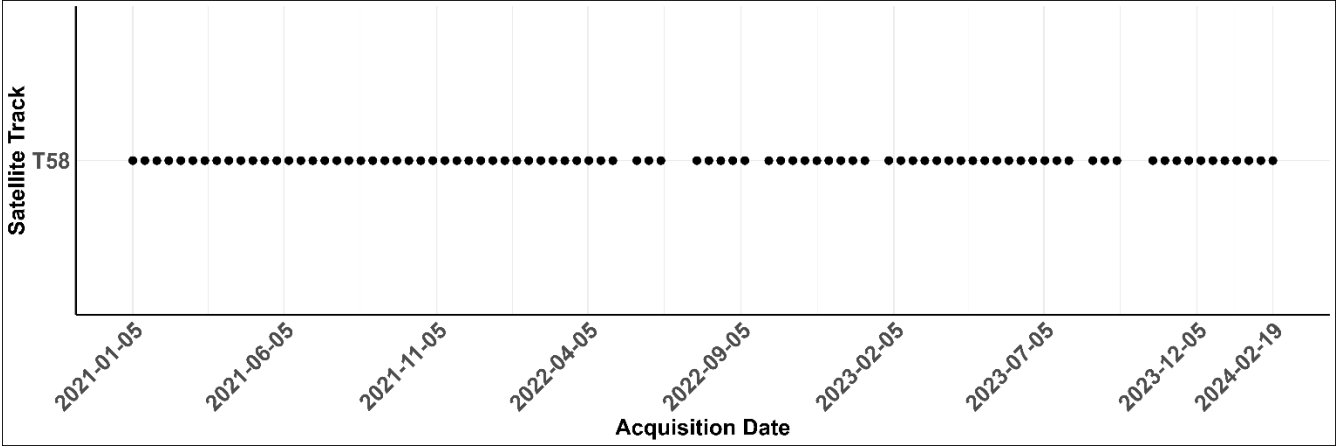

S8: Temporal InSAR persistent scatterer displacements for AOIs / RAMMS::ROCKFALL release areas A 02 and A03.

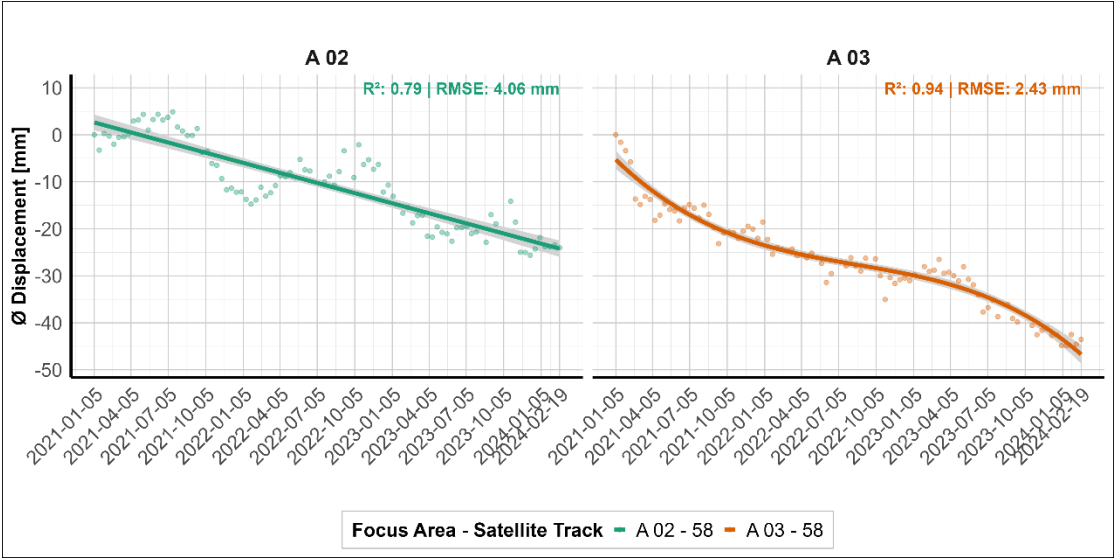

References

Kazhdan, M., Bolitho, M., and Hoppe, H.: Poisson surface reconstruction, in: SGP 2006: Symposium on geometry proceesing 2006, Cagliari, Sardinia, Italy, June 26 - 28, 2006, 61–70, 2006.

Naville, E.: The Temple of Deir El Bahari: Its Plan, its Founders, and its first Explorers, Offices of the Egypt exploration fund, 1894.
